# Supplementary material for: Investigation of the individual genetic evolution of SARS-CoV-2 in a small cluster during the rapid spread of the BF.5 lineage in Tokyo, Japan
Source: Front Microbiol. 2023 Sep 6;14:1229234. doi: 10.3389/fmicb.2023.1229234 (PMC10516552; doi:10.3389/fmicb.2023.1229234)
Supplement: Supplementary file 5 [file Table_1.XLSX]

## Sheet: SupplTab1
Supplementary Table 1. Characteristics of infected patient, Jun 29 through July 4, 2022.
Case no.	Pango Lineage	Gender	Age	Vaccination	Dinner parties & Gatherings	Date of onset	Specimen source	PCR-Confirmed date	CT value of PCR test	COVID-19 Symptoms at confirmation of infection	Degree of severity	outpatient visit date	hospitalization periods
Case 10	BA.2.12.1 (Pango v.4.2 consensus call)	Male	82	2	None	2022-06-16	Nasopharyngeal swab	2022-06-24	17.88	Cough, Sore throat, Tired	Mild symptoms	2022-07-05	2022/6/24-6/29
Case 11	BA.2.24 (Pango v.4.2 PLEARN-v1.18), Omicron (BA.2-like) (Scorpio)	Male	70	unknown	None	2022-06-22	Saliva	2022-06-22	20.53	Fever, Cough	Mild symptoms	2022-06-17	2022/6/20-7/13
Case 12	BA.5.2.20 (Pango v.4.2 PLEARN-v1.18), Omicron (BA.5-like) (Scorpio)	Female	28	2	None	2022-06-26	Saliva	2022-06-29	20.32	Cough, Sore throat	Mild symptoms	2022-06-28	2022/6/29-7/2
Case 13	BA.5.2.1 (Pango v.4.2 PLEARN-v1.18), Omicron (BA.5-like) (Scorpio)	Male	63	1	None	2022-06-30	Nasopharyngeal swab	2022-07-02	19.49	Cough	Mild symptoms	2022/6/22, 24	2022/6/27-7/12
Case 14	BA.5.2.1 (Pango v.4.2 PLEARN-v1.18), Omicron (BA.5-like) (Scorpio)	Male	55	1	None	2022-07-03	Nasopharyngeal swab	2022-07-03	26.44	Fever	Mild symptoms	2022-06-25	2022/6/28-7/13

## Sheet: SupplTab2
Supplementary Table 2. Nucleotide changes compared to the Wuhan-Hu-1 reference sequence (GenBank accession number MN908947.3, EPI_ISL_402124).
Case no.	Case 1	Case 2	Case 3	Case 4	Case 5	Case 6	Case 7	Case 8	Case 9	case 10	case 11	case 12	case 13	case 14
Pango lineage	BF.5 (Pango v.4.2 PANGO-v1.18), Omicron (BA.5-like) (Scorpio)	BF.5 (Pango v.4.2 PANGO-v1.18), Omicron (BA.5-like) (Scorpio)	BF.5 (Pango v.4.2 PANGO-v1.18), Omicron (BA.5-like) (Scorpio)	BF.5 (Pango v.4.2 PANGO-v1.18), Omicron (BA.5-like) (Scorpio)	BF.5 (Pango v.4.2 PANGO-v1.18), Omicron (BA.5-like) (Scorpio)	BF.5 (Pango v.4.2 PANGO-v1.18), Omicron (BA.5-like) (Scorpio)	BF.5 (Pango v.4.2 PANGO-v1.18), Omicron (BA.5-like) (Scorpio)	BF.5 (Pango v.4.2 PANGO-v1.18), Omicron (BA.5-like) (Scorpio)	BF.5 (Pango v.4.2 PANGO-v1.18), Omicron (BA.5-like) (Scorpio)	BA.2.24 (Pango v.4.2 PLEARN-v1.18), Omicron (BA.2-like) (Scorpio)	BA.2.12.1 (Pango v.4.2 consensus call)	BA.5.2.20 (Pango v.4.2 PLEARN-v1.18), Omicron (BA.5-like) (Scorpio)	BA.5.2.1 (Pango v.4.2 PLEARN-v1.18), Omicron (BA.5-like) (Scorpio)	BA.5.2.1 (Pango v.4.2 PLEARN-v1.18), Omicron (BA.5-like) (Scorpio)
nt mutations	C44T	C44T	C44T	C44T	C44T	C44T	C44T	C44T	C44T	T25G	C44T	C44T	C44T	C44T
	C241T	C241T	C241T	C241T	C241T	C241T	C241T	C241T	C241T	C44T		del234_242	C241T	del234_242
	T670G	T670G	T670G	T670G	T670G	T670G	T670G	T670G	T670G	C241T	A496C	del488_496	T670G	del488_495
	C1627T	C1627T	C1627T	C1627T	C1627T	C1627T	C1627T	C1627T	C1627T	A489C	del497_498	A497G	C1627T	A496G
	C2790T	C2790T	C2790T	C2790T	C2790T	C2790T	C2790T	C2790T	C2790T	del490_499	T670G	T670G	T2112C	T670G
	C3037T	C3037T	C3037T	C3037T	C3037T	C3037T	C3037T	C3037T	C3037T	T670G	G709A	C706T	C2790T	C706T
	G4184A	G4184A	G4184A	G4184A	G4184A	G4184A	G4184A	G4184A	G4184A	G713T	del710_717	del707_718	C3037T	del707_718
	C4321T	C4321T	C4321T	C4321T	C4321T	C4321T	C4321T	C4321T	C4321T	G970T	del968_976	del969_976	T3882C	del971_977
	T6979G	T6979G	T6979G	T6979G	T6979G	T6979G	T6979G	T6979G	T6979G	del971_979	A977G	del1210_1222	G4184A	T978C
	A8882G	A8882G	A8882G	A8882G	A8882G	A8882G	A8882G	A8882G	A8882G	del1205_1222	del1436_1442	del1436_1443	C4321T	del1205_1221
	C9344T	C9344T	C9344T	C9344T	C9344T	C9344T	C9344T	C9344T	C9344T	del1436_1446	G1681T	C1627T	T6979G	del1436_1443
	A9424G	A9424G	A9424G	A9424G	A9424G	A9424G	A9424G	A9424G	A9424G	del1689_1708	del1682_1708	del1690_1708	C9344T	C1627T
	C9534T	C9534T	C9534T	C9534T	C9534T	C9534T	C9534T	C9534T	C9534T	C1912A	T1921C	del1910_1936	A9424G	del1916_1929
	C9967T	C9967T	C9967T	C9967T	C9967T	C9967T	C9967T	C9967T	C9967T	del1913_1924	del1922_1931	T1939A	C9534T	T1930C
	C10029T	C10029T	C10029T	C10029T	C10029T	C10029T	C10029T	C10029T	C10029T	del2177_2191	del2177_2191	G1940A	C10029T	T2112C
	C10198T	C10198T	C10198T	C10198T	C10198T	C10198T	C10198T	C10198T	C10198T	del2443_2452	del2441_2451	del2177_2199	C10198T	del2177_2191
	G10447A	G10447A	G10447A	G10447A	G10447A	G10447A	G10447A	G10447A	G10447A	del2673_2692	del2687_2695	del2432_2449	G10447A	G2448A
	C10449A	C10449A	C10449A	C10449A	C10449A	C10449A	C10449A	C10449A	C10449A	C2790T	C2790T	C2450T	C10449A	C2790T
	del11288_11296	del11288_11296	del11288_11296	del11288_11296	del11288_11296	del11288_11296	del11288_11296	del11288_11296	del11288_11296	A2941T	del2931_2953	C2790T	G11083T	A2941G
	G12160A	G12160A	G12160A	G12160A	G12160A	G12160A	G12160A	G12160A	G12160A	del2942_2953	C3037T	del2945_2951	del11288_11296	del2942_2951
	C12880T	C12880T	C12880T	C12880T	C12880T	C12880T	C12880T	C12880T	C12880T	del3035_3035	del3197_3211	del3035_3035	G12160A	C3037T
	C14408T	C14408T	C14408T	C14408T	C14408T	C14408T	C14408T	C14408T	C14408T	C3037T	del3990_4003	C3037T	C12880T	del3198_3211
	C15714T	C15714T	C15714T	C15714T	C15714T	C15714T	C15714T	C15714T	C15714T	del3198_3217	G4184A	G3187A	C14408T	A3463G
	C16954T	C16954T	C16954T	C16954T	C16954T	C16954T	C16954T	C16954T	C16954T	A3469G	del4251_4264	del3188_3215	C15714T	del3464_3479
	C17410T	C17410T	C17410T	C17410T	C17410T	C17410T	C17410T	C17410T	C17410T	del3470_3473	C4321T	A3469G	C17410T	del3724_3733
	A18163G	A18163G	A18163G	A18163G	A18163G	A18163G	A18163G	A18163G	A18163G	T3477A	T4766G	del3470_3479	A18163G	T3882C
	C19524T	C19524T	C19524T	C19524T	C19524T	C19524T	C19524T	C19524T	C19524T	del3723_3733	T4767C	del3722_3733	C19955T	del3990_4003
	C19955T	C19955T	C19955T	C19955T	C19955T	C19955T	C19955T	C19955T	C19955T	del3992_4011	T4768A	A4001T	A20055G	G4184A
	A20055G	A20055G	A20055G	A20055G	A20055G	A20055G	A20055G	A20055G	A20055G	G4184A	A4769C	C4002G	C21618T	C4252T
	C21618T	C21618T	C21618T	C21618T	C21618T	C21618T	C21618T	C21618T	C21618T	A4251G	T4770C	G4184A	T21633C	del4254_4264
	T21633C	T21633C	T21633C	T21633C	T21633C	T21633C	T21633C	T21633C	T21633C	del4253_4264	T4771A	del4251_4273	del21635_21643	C4321T
	del21635_21643	del21635_21643	del21635_21643	del21635_21643	del21635_21643	del21635_21643	del21635_21643	del21635_21643	del21635_21643	C4321T	A4773C	C4321T	A21766C	del4503_4513
	A21766C	A21766C	A21766C	A21766C	A21766C	A21766C	A21766C	A21766C	A21766C	C4499A	A4774C	T4492C	del21767_21772	del4779_4789
	del21767_21772	del21767_21772	del21767_21772	del21767_21772	del21767_21772	del21767_21772	del21767_21772	del21767_21772	del21767_21772	del4500_4513	C4776T	del4494_4513	G21987A	del5042_5059
	G21987A	G21987A	G21987A	G21987A	G21987A	G21987A	G21987A	G21987A	G21987A	del4763_4784	T4781C	del4764_4789	T22200G	T5060C
	T22200G	T22200G	T22200G	T22200G	T22200G	T22200G	T22200G	T22200G	T22200G	T4785C	C4782A	del5043_5059	G22578A	del5298_5308
	G22578A	G22578A	G22578A	G22578A	G22578A	G22578A	G22578A	G22578A	G22578A	del5043_5059	C4784G	T5060A	C22674T	del5561_5576
	C22674T	C22674T	C22674T	C22674T	C22674T	C22674T	C22674T	C22674T	C22674T	T5060A	T4785A	T5299A	T22679C	A5821C
	T22679C	T22679C	T22679C	T22679C	T22679C	T22679C	T22679C	T22679C	T22679C	C5284G	G4787A	del5300_5308	C22686T	C5822T
	C22686T	C22686T	C22686T	C22686T	C22686T	C22686T	C22686T	C22686T	C22686T	del5285_5305	C4788G	del5562_5578	A22688G	del5823_5839
	A22688G	A22688G	A22688G	A22688G	A22688G	A22688G	A22688G	A22688G	A22688G	A5560G	T4789G	del5819_5830	G22775A	del5846_5854
	G22775A	G22775A	G22775A	G22775A	G22775A	G22775A	G22775A	G22775A	G22775A	del5561_5567	del5042_5059	C5832T	A22786C	T6082G
	A22786C	A22786C	A22786C	A22786C	A22786C	A22786C	A22786C	A22786C	A22786C	G5830A	T5060C	C5835T	G22813T	G6083C
	G22813T	G22813T	G22813T	G22813T	G22813T	G22813T	G22813T	G22813T	G22813T	del5831_5841	del5298_5308	G5837C	T22882G	A6084C
	T22882G	T22882G	T22882G	T22882G	T22882G	T22882G	T22882G	T22882G	T22882G	del6080_6106	G5830A	T5840A	T22917G	T6085A
	T22917G	T22917G	T22917G	T22917G	T22917G	T22917G	T22917G	T22917G	T22917G	del6346_6379	del5831_5855	del6080_6115	G22992A	T6086C
	G22992A	G22992A	G22992A	G22992A	G22992A	G22992A	G22992A	G22992A	G22992A	T6394G	del6092_6115	G6344A	C22995A	T6087G
	C22995A	C22995A	C22995A	C22995A	C22995A	C22995A	C22995A	C22995A	C22995A	del6621_6637	G6116C	del6345_6379	A23013C	A6088G
	A23013C	A23013C	A23013C	A23013C	A23013C	A23013C	A23013C	A23013C	A23013C	del6845_6867	A6355G	T6634C	T23018G	A6093T
	T23018G	T23018G	T23018G	T23018G	T23018G	T23018G	T23018G	T23018G	T23018G	A7112T	del6356_6373	del6635_6638	A23055G	G6094C
	A23055G	A23055G	A23055G	A23055G	A23055G	A23055G	A23055G	A23055G	A23055G	C7113G	del6623_6637	del6845_6868	A23063T	T6095C
	A23063T	A23063T	A23063T	A23063T	A23063T	A23063T	A23063T	A23063T	A23063T	G7115A	del6847_6868	C6941T	T23075C	T6096A
	T23075C	T23075C	T23075C	T23075C	T23075C	T23075C	T23075C	T23075C	T23075C	T7117A	C7113T	del7112_7134	A23403G	del6098_6100
	A23403G	A23403G	A23403G	A23403G	A23403G	A23403G	A23403G	A23403G	A23403G	T7118C	del7114_7135	del7360_7408	C23525T	G6102A
	C23525T	C23525T	C23525T	C23525T	C23525T	C23525T	C23525T	C23525T	C23525T	C7119A	T7345A	T7651C	T23599G	T6103A
	T23599G	T23599G	T23599G	T23599G	T23599G	T23599G	T23599G	T23599G	T23599G	T7120A	del7347_7408	del7652_7674	C23604A	A6105G
	C23604A	C23604A	C23604A	C23604A	C23604A	C23604A	C23604A	C23604A	C23604A	A7121T	A7930G	A7930G	C23854A	ins6106T
	C23854A	C23854A	C23854A	C23854A	C23854A	C23854A	C23854A	C23854A	C23854A	A7123C	del7931_7940	del7931_7940	G23948T	del6344_6368
	G23948T	G23948T	G23948T	G23948T	G23948T	G23948T	G23948T	G23948T	G23948T	C7124T	A8173G	del8174_8188	A24424T	del6624_6637
	A24424T	A24424T	A24424T	A24424T	A24424T	A24424T	A24424T	A24424T	A24424T	C7125A	G8174A	del8438_8451	T24469A	del6845_6868
	T24469A	T24469A	T24469A	T24469A	T24469A	T24469A	T24469A	T24469A	T24469A	T7126G	T8176C	del8711_8719	C25000T	T6979G
	G24620T	G24620T	G24620T	G24620T	G24620T	G24620T	G24620T	G24620T	G24620T	G7128C	C8177G	del8886_8908	C25584T	A7121C
	C25000T	C25000T	C25000T	C25000T	C25000T	C25000T	C25000T	C25000T	C25000T	A7130T	G8178A	del9147_9169	C26060T	T7122A
	C25584T	C25584T	C25584T	C25584T	C25584T	C25584T	C25584T	C25584T	C25584T	G7131A	G8179A	C9344T	C26270T	A7123T
	C26060T	C26060T	C26060T	C26060T	C26060T	C26060T	C26060T	C26060T	C26060T	T7132C	C8180A	del9404_9427	G26529A	C7124T
	C26270T	C26270T	C26270T	C26270T	C26270T	C26270T	C26270T	C26270T	C26270T	G7133T	A8181G	C9534T	C26577G	C7125G
	G26529A	G26529A	G26529A	G26529A	G26529A	G26529A	G26529A	G26529A	G26529A	T7134A	A8182G	del9657_9673	C26625T	T7126A
	C26577G	C26577G	C26577G	C26577G	C26577G	C26577G	C26577G	C26577G	C26577G	C7350A	G8183T	del9923_9940	G26709A	T7127A
	G26709A	G26709A	G26709A	G26709A	G26709A	G26709A	G26709A	G26709A	G26709A	del7351_7408	G8184A	T9941G	A27038G	G7128C
	A27038G	A27038G	A27038G	A27038G	A27038G	A27038G	A27038G	A27038G	A27038G	T7651C	G8185A	C10029T	C27371T	T7129G
	C27532T	C27532T	C27532T	C27532T	C27532T	C27532T	C27532T	C27532T	C27532T	del7652_7674	T8186G	del10164_10177	C27807T	A7130G
	C27807T	C27807T	C27807T	C27807T	C27807T	C27807T	C27807T	C27807T	C27807T	del7937_7939	T8187A	C10198T	C27889T	G7131T
	C27889T	C27889T	C27889T	C27889T	C27889T	C27889T	C27889T	C27889T	C27889T	del8168_8187	del8429_8450	C10449A	A28271T	T7132G
	A28271T	A28271T	A28271T	A28271T	A28271T	A28271T	A28271T	A28271T	A28271T	del8438_8451	del8703_8719	del10691_10706	C28311T	G7133A
	C28311T	C28311T	C28311T	C28311T	C28311T	C28311T	C28311T	C28311T	C28311T	del8702_8728	A8887G	A10950G	A28330G	del7292_7405
	A28330G	A28330G	A28330G	A28330G	A28330G	A28330G	A28330G	A28330G	A28330G	T8729G	del8888_8900	del10951_10981	A28363T	G7406T
	A28363T	A28363T	A28363T	A28363T	A28363T	A28363T	A28363T	A28363T	A28363T	del8879_8899	del9147_9166	G11175A	del28364_28372	del7661_7672
	del28364_28372	del28364_28372	del28364_28372	del28364_28372	del28364_28372	del28364_28372	del28364_28372	del28364_28372	del28364_28372	del9146_9167	C9344T	T11176G	G28881A	A7930G
	A28402G	A28402G	A28402G	A28402G	A28402G	A28402G	A28402G	A28402G	A28402G	C9344T	del9407_9419	del11177_11245	G28882A	del7931_7940
	G28881A	G28881A	G28881A	G28881A	G28881A	G28881A	G28881A	G28881A	G28881A	del9407_9419	C9534T	del11288_11296	G28883C	del8159_8188
	G28882A	G28882A	G28882A	G28882A	G28882A	G28882A	G28882A	G28882A	G28882A	C9534T	G9646A	del11509_11509	A29510C	del8438_8451
	G28883C	G28883C	G28883C	G28883C	G28883C	G28883C	G28883C	G28883C	G28883C	del9653_9670	del9647_9673	del11744_11767	del29734_29759	del8705_8718
	A29510C	A29510C	A29510C	A29510C	A29510C	A29510C	A29510C	A29510C	A29510C	C9866T	C9866T	del12008_12033	G29798A	T8719C
						del29636_29636				A9922T	del9922_9940	G12160A		del8888_8909
	del29734_29759	del29734_29759	del29734_29759	del29734_29759	del29734_29759	del29734_29759	del29734_29759	del29734_29759	del29734_29759	del9923_9931	C10029T	del12263_12283		del9146_9167
										C10029T	A10164T	G12310A		C9344T
										del10163_10181	C10165T	del12527_12547		del9407_9419
										C10198T	A10174C	del12794_12811		C9534T
										del10433_10507	C10175T	C12880T		G9649A
										del10583_10705	A10176G	A13066G		del9650_9673
										del10951_10978	ins10177G	del13067_13091		del9923_9942
										G10979T	T10177C	A13453T		C10029T
										G11179A	C10198T	del13454_13473		del10166_10183
										del11180_11245	C10449A	A13722T		C10198T
										del11288_11296	del10703_10706	del13723_13737		C10449A
										del11489_11507	A10964C	del13980_13986		del10691_10706
										del11742_11767	T10968G	del14224_14237		C10965G
										T11769C	C10969A	C14408T		del10966_10981
										del12013_12034	C10970T	del14488_14501		G11083T
										del12266_12287	A10971T	del14732_14757		A11228C
										del12537_12547	A10972G	T14758A		T11229A
										A12585G	A10973G	del15019_15031		G11230C
										del12800_12818	G10974C	del15277_15293		C11232G
										C12880T	G10976T	del15535_15549		G11234T
										del13072_13090	C10977G	C15714T		T11236A
										del13337_13346	G10979A	A15753G		G11241A
										C13446T	T10980G	del15754_15768		del11288_11296
										del13447_13473	del11288_11296	del16012_16029		C11487T
										A13722T	C11674T	A16281G		del11488_11509
										del13723_13737	del11744_11766	del16283_16293		G11743A
										del13980_13986	A12007G	A16482G		del11744_11758
										C14225T	del12008_12035	del16483_16495		A11759G
										del14226_14238	G12277C	C16616A		A12007G
										C14408T	del12279_12292	del16750_16752		del12008_12035
										del14482_14499	del12524_12526	del17244_17250		G12160A
										G14500T	A12527C	C17410T		del12263_12289
										del14732_14763	C12528A	del17468_17475		del12537_12547
										T14764G	ins12529C	del17728_17741		del12800_12818
										del15019_15031	T12532C	del17992_18009		C12880T
										C15273T	C12534G	A18010C		A13066G
										del15274_15295	T12535C	A18163G		T13067G
										G15535T	C12540A	del18262_18275		T13070G
										del15536_15543	A12541G	del18508_18517		T13071C
										G15544A	T12542G	del18775_18786		C13072T
										C15545A	C12543T	del19015_19033		T13073G
										C15714T	G12545A	del19284_19287		G13074A
										C15746G	C12546T	del19534_19562		T13075A
										del15747_15768	A12547T	del19807_19842		G13076T
										del16013_16029	ins12547TT	T19843A		C13077G
										del16282_16296	C12809A	C19955T		T13079A
										A16482G	T12811A	A20055G		T13080C
										del16483_16495	G12812A	G20087C		T13081A
										A16748T	C12880T	A20094G		G13082A
										del16749_16764	G13340A	del20095_20102		C13083T
										del17008_17022	del13454_13471	G20352A		G13085T
										A17244T	C13721T	del20353_20364		A13087T
										del17245_17247	del13722_13728	del20626_20643		G13088A
										G17248A	C13730A	A20895G		T13090A
										ins17250G	A13979C	C20896G		A13338G
										C17410T	A13980G	del20897_20901		del13339_13348
										del17467_17476	C13981G	del21265_21292		A13453T
										del17728_17743	G13982T	T21293A		del13454_13473
										del17993_18012	T13983G	A21547C		G13723T
										A18163G	G13984A	A21548T		C13724G
										del18262_18275	C14408T	C21549A		T13725C
										del18505_18516	del14482_14499	del21553_21557		G13726A
										del18753_18786	G14500T	C21618T		T13727A
										C19011T	del15030_15030	T21633C		G13729T
										del19012_19035	del15535_15549	del21635_21643		C13730G
										del19280_19287	C15714T	A21766C		T13731C
										del19543_19560	C15746G	del21767_21772		del13978_13985
										T19561A	del15747_15768	C21815T		del14212_14235
										del19807_19834	A16482G	T21818C		A14236G
										T19839C	T16483A	T21819C		C14408T
										C19955T	del16485_16506	T21820G		G14488T
										A20055G	G16741A	A21822T		A14489G
										del20068_20088	T16742C	G21824C		G14490T
										del20352_20364	G16744T	A21825C		A14493T
										ins20619A	G16745C	T21826G		G14494T
										del20626_20631	T16746A	G21828A		G14495C
										G20632C	A16747G	G21830C		T14496A
										del20884_20898	A16748C	T21832G		del14746_14755
										G20899A	A16749T	G21987A		A14756G
										G20900A	C16750A	del22071_22087		del15020_15030
										G21149A	C16751T	T22200G		A15267T
										del21150_21171	T16752G	A22330T		del15268_15294
										T21272A	C17410T	del22331_22352		G15535T
										del21274_21294	A17466T	C22353T		del15537_15549
										del21550_21551	A17727C	T22354C		C15714T
										C21618T	del17728_17733	G22578A		A15753G
										T21633C	C17734T	G22599T		del15754_15768
										del21635_21643	T17735G	A22600C		del16012_16029
										del21812_21832	T17736C	T22601A		del16473_16494
										G21987A	A17737G	T22602C		del17008_17022
										del22071_22087	C17738G	T22603C		del17244_17250
										T22200G	A17739T	C22605A		C17410T
										del22339_22354	C17740G	A22606T		del17467_17476
										G22577A	G17741A	C22674T		del17728_17740
										G22578A	ins17991CT	T22679C		G17741A
										del22598_22608	A17994G	C22686T		C17985T
										C22674T	T17996C	A22688G		del17986_18012
										T22679C	T17997C	G22775A		A18163G
										C22686T	del17998_18000	A22786C		del18262_18276
										A22688G	G18002A	G22813T		del18508_18517
										G22775A	T18003G	del22850_22861		T18768C
										A22786C	T18006G	T22882G		del18769_18788
										G22813T	G18007C	T22917G		T19034C
										del22850_22861	A18008G	G22992A		C19529T
										T22882G	A18009G	C22995A		del19531_19560
										G22992A	A18010T	A23013C		A19818T
										C22995A	T18011G	T23018G		del19819_19832
										A23013C	T18012A	A23055G		T19839C
										A23040G	A18163G	del23066_23075		C19955T
										A23055G	del18262_18276	A23305T		A20055G
										del23066_23075	C18512A	del23306_23323		del20086_20093
										A23403G	del18745_18786	A23403G		del20342_20358
										C23525T	del19015_19033	C23525T		del20626_20643
										del23554_23563	G19285C	del23554_23566		del20872_20899
										G23567T	G19286A	G23568A		del21163_21167
										T23599G	T19287G	T23599G		del21272_21294
										C23604A	del19543_19561	C23604A		del21550_21580
										A23743G	del19819_19843	A23743G		C21618T
										del23744_23755	T19844A	del23744_23755		T21633C
										C23854A	C19955T	C23854A		del21635_21643
										G23948T	A20055G	G23948T		A21766C
										del23994_24007	del20086_20100	A23992C		del21767_21772
										T24008A	del20352_20364	del23994_24010		del21815_21831
										G24216A	del20623_20643	del24215_24215		G21987A
										A24424T	del20893_20900	A24424T		del22071_22087
										A24439G	A21547G	del24440_24451		T22200G
										A24440G	A21548T	T24469A		del22339_22354
										A24441G	C21549T	del24698_24712		G22578A
										C24444G	A21550C	C25000T		del22598_22607
										G24445T	A21551T	del25223_25234		C22674T
										T24447G	C21618T	ins25237T		T22679C
										T24448G	T21633C	del25486_25500		C22686T
										G24449T	del21635_21643	A25505G		A22688G
										T24450G	del21815_21832	C25584T		G22775A
										T24451A	G21987A	del25905_25929		A22786C
										T24469A	del22061_22088	C26060T		G22813T
										del24698_24712	T22200G	C26142T		del22850_22861
										A24949C	G22331T	del26143_26149		T22882G
										del24950_24981	G22332A	G26155A		T22917G
										C25000T	T22334A	T26157C		G22992A
										del25223_25234	G22335C	T26159G		C22995A
										del25495_25500	G22336A	A26161G		A23013C
										A25501G	G22340A	C26270T		T23018G
										A25505G	C22341A	del26368_26373		del23073_23074
										C25584T	T22342A	G26529A		C23298A
										A25905G	G22344C	C26577G		del23299_23308
										del25906_25922	G22346A	del26622_26634		A23403G
										C26060T	C22347G	G26709A		C23525T
										A26141T	T22348C	A26866T		del23554_23554
										del26142_26157	G22349T	del26867_26879		C23556T
										C26270T	A22351T	C27012T		G23562A
										del26368_26373	G22352T	A27118C		T23563A
										C26577G	C22353G	C27119G		G23564C
										C26628T	T22354G	A27120G		C23565G
										A26629T	G22578A	G27121T		A23566G
										T26631G	A22600T	del27362_27381		G23567T
										G26709A	T22601C	C27513T		T23569A
										del27118_27119	T22602G	del27610_27622		T23599G
										A27259C	T22603G	C27807T		C23604A
										G27382C	G22604T	del28095_28110		A23743T
										A27383T	C22605G	A28271T		del23744_23754
										T27384C	C22674T	C28311T		C23854A
										del27610_27622	T22679C	A28330G		G23948T
										C27807T	C22686T	del28349_28370		A23992C
										del27861_27879	A22688G	C28617A		A23993C
										del28101_28109	G22775A	T28618G		A23994T
										T28110C	A22786C	G28619A		C23996T
										A28271T	G22813T	G28620T		A23998T
										C28311T	del22850_22861	G28621T		A23999T
										del28360_28369	T22882G	G28881A		A24424T
										A28370G	T22917A	G28882A		del24440_24452
										T28618A	G22992A	G28883C		T24469A
										del28619_28624	C22995A	A28971G		del24689_24711
										G28881A	A23013C	del28972_28975		del24962_24983
										G28882A	A23040G	del29219_29224		C25000T
										G28883C	A23055G	T29225G		del25223_25234
										del28970_28972	del23066_23075	del29471_29491		del25496_25503
										A29221C	ins23320CA	A29510C		A25505G
										del29222_29226	C23320T			C25584T
										A29478C	A23321T			C25638G
										del29479_29482	A23403G			del25639_25644
										A29510C	C23525T			del25891_25920
										del29734_29759	T23599G			G25922A
											C23604A			T25923A
											C23673T			C26060T
											A23743G			C26270T
											del23744_23755			del26368_26373
											C23854A			G26529A
											G23948T			C26577G
											A24205T			A26627G
											A24209T			del26628_26640
											C24210T			G26709A
											T24211G			A26860G
											T24212G			del26862_26879
											C24213A			A27038G
											G24216A			del27108_27123
											A24424T			C27371T
											A24439C			del27610_27623
											A24440T			C27807T
											A24441G			del27870_27892
											C24442A			C27893G
											C24444G			T27895A
											G24445T			del28005_28109
											C24446T			T28110C
											T24447G			A28271T
											del24449_24451			C28311T
											T24469A			A28330G
											A24696G			G28350T
											del24697_24712			T28351C
											A24963T			A28353C
											del24965_24982			C28355G
											T24983A			A28356T
											C25000T			G28357T
											A25216C			A28358C
											G25217C			T28360A
											G25218T			G28361T
											T25219A			G28368T
											T25221C			C28369G
											ins25222TGGATG			A28612G
											A25225G			del28613_28631
											C25231T			G28881A
											del25232_25237			G28882A
											C25416T			G28883C
											C25490A			A28971G
											del25491_25503			del28972_28975
											A25505G			A29221C
											C25584T			del29222_29226
											C26060T			del29469_29494
											del26134_26154			A29510C
											G26155A			del29734_29759
											C26270T
											del26362_26375
											C26577G
											del26628_26638
											G26709A
											del27107_27107
											A27118G
											C27119T
											del27120_27125
											A27259C
											G27382C
											A27383T
											T27384C
											del27608_27621
											T27622A
											C27807T
											G27861A
											ins27863TAGCTCTT
											C27864T
											G27870A
											A27872G
											del27873_27881
											G27882T
											C27883A
											del28101_28110
											A28271T
											C28311T
											A28363T
											del28364_28372
											T28618A
											del28619_28624
											G28881A
											G28882A
											G28883C
											del28970_28977
											A29221C
											del29222_29226
											del29468_29485
											A29486G
											A29488G
											A29490C
											ins29491TG
											T29492C
											T29493C
											A29510C

## Sheet: SupplTab3
Supplementary Table 3. DDBJ accession numbers for each case in this study.
Case no.	Virus/location/virus name/year	DDBJ accession no.
Case 1	hCoV-19/Japan/20220630-66279/2022	LC772113
Case 2	hCoV-19/Japan/20220701-66445/2022	LC772116
Case 3	hCoV-19/Japan/20220701-66447/2022	LC772118
Case 4	hCoV-19/Japan/20220701-66434/2022	LC772114
Case 5	hCoV-19/Japan/20220701-66446/2022	LC772117
Case 6	hCoV-19/Japan/20220701-66439/2022	LC772115
Case 7	hCoV-19/Japan/20220701-66455/2022	LC772119
Case 8	hCoV-19/Japan/20220704-66795/2022	LC772122
Case 9	hCoV-19/Japan/20220703-66702/2022	LC772121
Case 10	hCoV-19/Japan/65691/2022	LC772124
Case 11	hCoV-19/Japan/65484/2022	LC772123
Case 12	hCoV-19/Japan/66207/2022	LC772125
Case 13	hCoV-19/Japan/20220702-66639/2022	LC772120
Case 14	hCoV-19/Japan/66711/2022	LC772126
